# Supplementary material for: Disruption of Structural Disulfides of Coagulation FXIII-B Subunit; Functional Implications for a Rare Bleeding Disorder
Source: MDPI journal article supplement (doi:10.3390/ijms20081956), 2019-04-22

## **Supplementary file**

# **Disruption of structural disulfides of Coagulation FXIII-B subunit; functional implications for a rare bleeding disorder**

**Sneha Singh<sup>1</sup>, Mohammad Suhail Akhter<sup>1,2</sup>, Johannes Dodt<sup>3</sup>, Amit Sharma<sup>1,4</sup>, Senthivelrajan Kaniyappan<sup>5</sup>, Hamideh Yadegari<sup>1</sup>, Vytatus Ivaskevicius<sup>1</sup>, Johannes Oldenburg<sup>1</sup> and Arijit Biswas<sup>1,\*</sup>**

<sup>1</sup> Institute of Experimental Haematology and Transfusion Medicine, University Clinic Bonn, 53127 Bonn, Germany

<sup>2</sup> College of Applied medical Sciences, Jazan University, Jizan, Saudi Arabia.

<sup>3</sup> Paul-Ehrlich Institute, Langen. Germany.

<sup>4</sup> Department of Hematology, All India Institute of medical Sciences, New Delhi, India

<sup>5</sup> DZNE, German Center for Neurodegenerative Diseases, Bonn, Germany

\* Correspondence: PD Dr. Arijit Biswas; [arijit.biswas@ukb.uni-bonn.de](mailto:arijit.biswas@ukb.uni-bonn.de); Tel.: +49-228-287-19428

**Figure S1. The RMSD graph for MD simulation-equilibration run of the FXIII-B subunit model. The region under blue shade is the production phase representing post equilibration simulation run.**

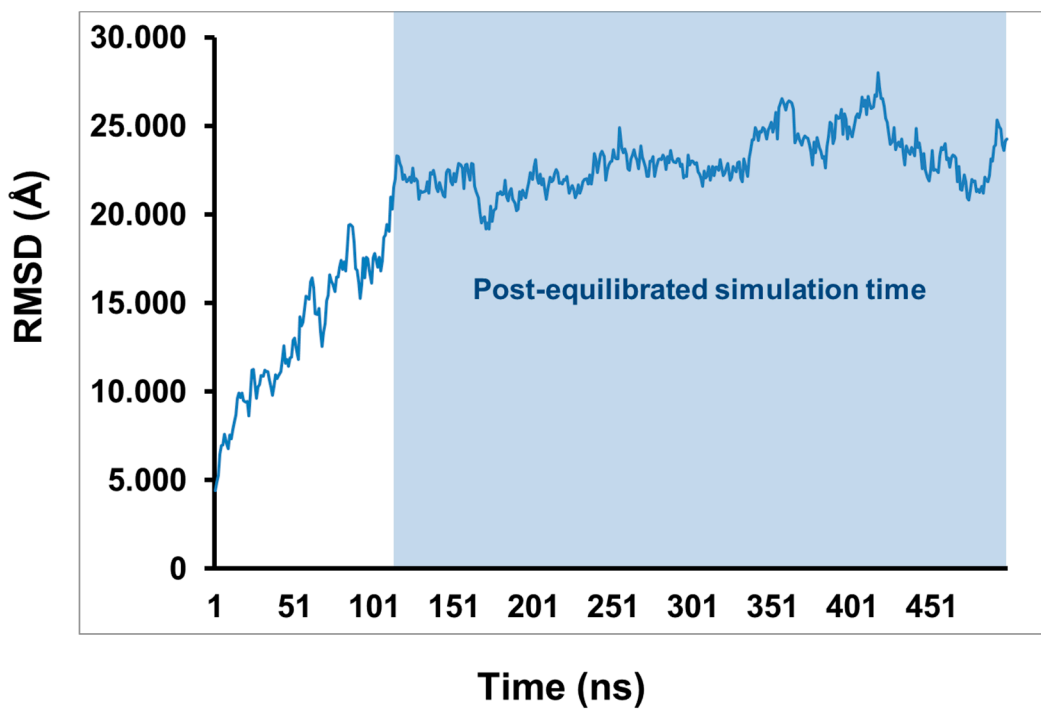

**Figure S2. Difference in structures of the assembled model and the simulation equilibrated final model.**

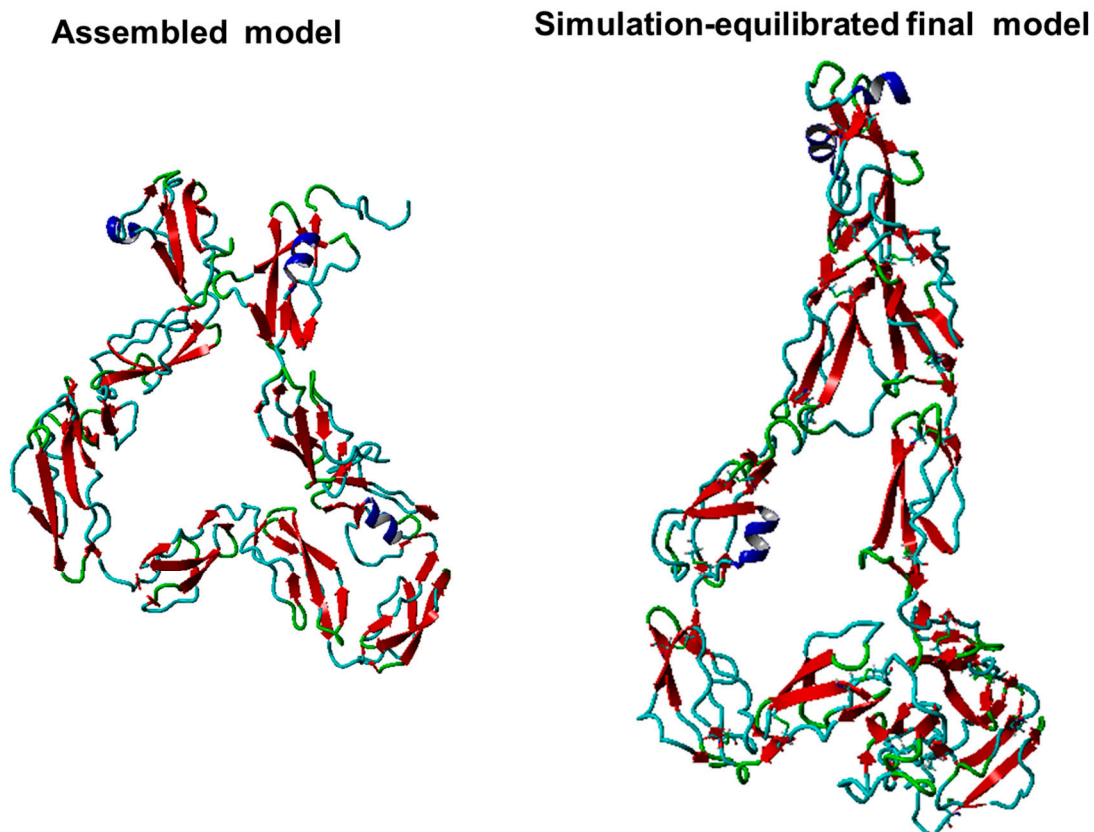

**Figure S3. Flexibility/ RMSF graph for the FXIII-B subunit monomer model simulation.**

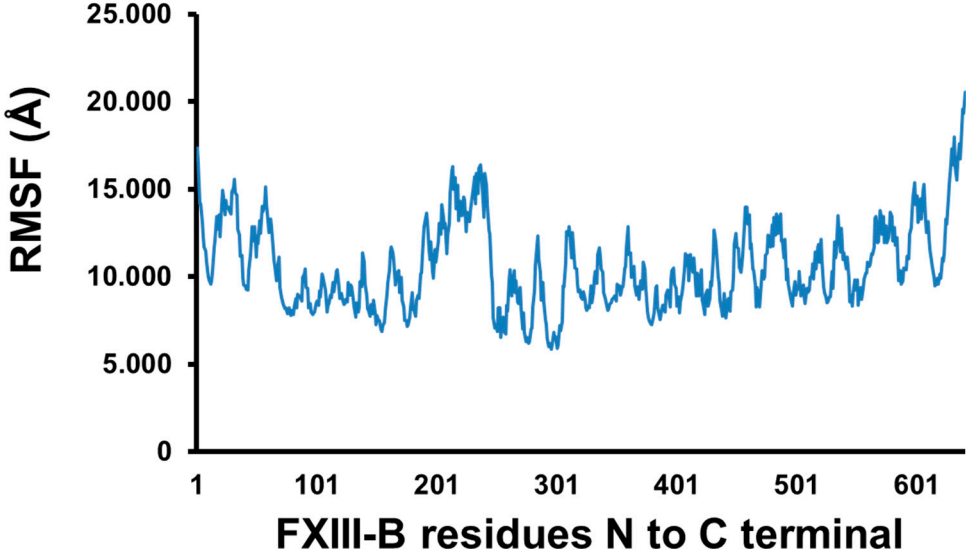

Supplement: s1 [file s1]
